# Supplementary material
Source: HighWire-hosted journal article supplement (https://www.cmajopen.ca/highwire/filestream/80854/field_highwire_adjunct_files/1/open-2014-0049-2-at.pdf)
Supplement: open-2014-0049-2-at.pdf [file open-2014-0049-2-at.pdf]

**Appendix 2** (as supplied by the authors): Two-year transition matrix estimating the probability of changing cost states within a 2-year period, where rows represent the current cost state and columns represent the future cost state in 2 years\*

|                    |                    | Future Cost State (in 2 years) |               |                    |                   |                    |                   |                 |                |
|--------------------|--------------------|--------------------------------|---------------|--------------------|-------------------|--------------------|-------------------|-----------------|----------------|
|                    |                    | Top 5% (Alive)                 | Top 5% (Died) | Top 5%–10% (Alive) | Top 5%–10% (Died) | Bottom 90% (Alive) | Bottom 90% (Died) | No Cost (Alive) | No cost (Died) |
| Current Cost State | Top 5% (Alive)     | 1.8                            | 0.4           | 1.8                | 0.3               | 35.2               | 1.1               | 54.0            | 5.3            |
|                    | Top 5% (Died)      | 0                              | 0             | 0                  | 0                 | 0                  | 0                 | 0               | 100            |
|                    | Top 5%–10% (Alive) | 1.8                            | 0.4           | 1.9                | 0.3               | 37.2               | 1.1               | 53.6            | 3.8            |
|                    | Top 5%–10% (Died)  | 0                              | 0             | 0                  | 0                 | 0                  | 0                 | 0               | 100            |
|                    | Bottom 90% (Alive) | 1.8                            | 0.4           | 2.0                | 0.3               | 42.2               | 1.2               | 51.3            | 0.9            |
|                    | Bottom 90% (Died)  | 0                              | 0             | 0                  | 0                 | 0                  | 0                 | 0               | 100            |
|                    | No cost (Alive)    | 1.4                            | 0.3           | 1.4                | 0.2               | 26.5               | 0.9               | 67.3            | 1.9            |
|                    | No cost (Died)     | 0                              | 0             | 0                  | 0                 | 0                  | 0                 | 0               | 100            |

\*All estimates are reported as percentages (%). Within the matrix, all rows sum to 100%. Patients with no hospitalizations are categorized as “No cost (Alive).”
